# Supplementary material for: Solvent Extraction and Identification of Active Anticariogenic Metabolites in Piper cubeba L. through 1H-NMR-Based Metabolomics Approach
Source: PubMed Central journal article supplement (PMC6099612; doi:10.3390/molecules23071730), 2018-07-16
Supplement: molecules-23-01730-s001.pdf [file molecules-23-01730-s001.pdf]

## SUPPLEMENTARY MATERIALS

**Table S1.** <sup>1</sup>H NMR characteristic signals of identified putative metabolites in *P. cubeba* L. extracts and fractions.

| Metabolites               | Reported <sup>1</sup> H NMR signals | ME       | EE       | HE       | HF       | EAF      | AMF      |
|---------------------------|-------------------------------------|----------|----------|----------|----------|----------|----------|
| <b>1. Cubebin</b>         | 6.80–6.40 (m)                       | +        | +        | +        | +        | +        | +        |
|                           | 5.95 (s)                            | +        | +        | +        | +        | +        | +        |
|                           | 4.05 (dd)                           | +        | +        | +        | +        | +        | +        |
|                           | 3.72 (dd)                           | 3.74 (m) | 3.74 (m) | 3.74 (m) | 3.73 (m) | 3.74 (m) | 3.74 (m) |
|                           | 2.90-2.50 (m)                       | +        | +        | +        | +        | +        | +        |
|                           | 2.30-1.90 (m)                       | +        | +        | +        | +        | +        | +        |
| <b>2. Yatein</b>          | 6.69 (d, <i>J</i> = 8.3)            | +        | nd       | +        | +        | +        | +        |
|                           | 6.36 (s)                            | +        | +        | +        | +        | +        | +        |
|                           | 5.94 (d, <i>J</i> = 1.5)            | 5.94 (m) | 5.94 (m) | 5.94 (m) | 5.94 (m) | 5.94 (m) | 5.94 (m) |
|                           | 5.93 (d, <i>J</i> = 1.5)            | 5.93 (m) | 5.93 (m) | 5.93 (m) | 5.93 (m) | 5.93 (m) | 5.93 (m) |
|                           | 3.82 (s)                            | +        | +        | +        | +        | +        | +        |
|                           | 2.92-2.89 (m)                       | nd       | nd       | nd       | nd       | +        | nd       |
| <b>3. Hinokinin</b>       | 2.63-2.48 (m)                       | +        | +        | +        | +        | +        | +        |
|                           | 6.80–6.40 (m)                       | +        | +        | +        | +        | +        | +        |
|                           | 5.90 (s)                            | +        | +        | +        | +        | +        | +        |
|                           | 2.60 (d, <i>J</i> = 7.1)            | +        | +        | +        | 2.60 (m) | +        | +        |
|                           | 2.55 (m)                            | +        | +        | +        | +        | +        | +        |
|                           | 2.45 (d, <i>J</i> = 8.6)            | 2.45 (m) | 2.45 (m) | 2.45 (m) | 2.45 (m) | 2.45 (m) | 2.45 (m) |
| <b>4. Dihydro-cubebin</b> | 6.60 (m)                            | +        | +        | +        | +        | +        | +        |
|                           | 3.70 (dd, <i>J</i> = 1.3, 11.3)     | 3.74 (m) | 3.74 (m) | 3.74 (m) | 3.73 (m) | 3.74 (m) | 3.73 (m) |
|                           | 3.20 (s)                            | nd       | nd       | nd       | +        | +        | +        |
|                           | 2.70 (d, <i>J</i> = 8.7)            | 2.70 (m) | 2.70 (m) | nd       | 2.72 (m) | 2.72 (m) | 2.70 (m) |
|                           | 2.65 (d, <i>J</i> = 8.7)            | +        | +        | nd       | +        | nd       | +        |
|                           | 2.56 (d, <i>J</i> = 5.7)            | 2.56 (m) | nd       | nd       | +        | 2.56 (m) | nd       |
| <b>5. Dihydro-clusin</b>  | 2.51 (d, <i>J</i> = 5.7)            | 2.50 (m) | +        | nd       | +        | 2.50 (m) | 2.50 (m) |
|                           | 6.72 (d, <i>J</i> = 8.0)            | +        | +        | +        | +        | +        | +        |
|                           | 6.59 (d, <i>J</i> = 8.0)            | +        | +        | +        | +        | +        | +        |
|                           | 6.36 (s)                            | +        | +        | +        | +        | +        | +        |
|                           | 5.92 (s)                            | +        | +        | +        | +        | +        | +        |
|                           | 3.84 (s)                            | +        | +        | +        | +        | +        | +        |
| <b>6. Cubebinin</b>       | 3.80-3.42 (m)                       | +        | +        | +        | +        | +        | +        |
|                           | 1.88 (m)                            | +        | +        | +        | +        | nd       | nd       |
|                           | 6.47 (s)                            | +        | +        | nd       | nd       | +        | +        |
|                           | 6.40 (s)                            | +        | +        | +        | +        | +        | +        |
|                           | 6.36 (s)                            | +        | +        | +        | +        | +        | +        |
|                           | 5.27 (s)                            | +        | +        | +        | +        | nd       | +        |
|                           | 4.03 (t, <i>J</i> = 8.0)            | +        | +        | +        | +        | +        | +        |
|                           | 3.84 (s)                            | +        | +        | +        | +        | +        | +        |
|                           | 3.82 (s)                            | +        | +        | +        | +        | +        | +        |
|                           | 3.80 (s)                            | +        | +        | +        | +        | +        | +        |
| <b>7. Magnosalin</b>      | 3.62 (t, <i>J</i> = 8.0)            | +        | +        | +        | +        | +        | +        |
|                           | 2.04-2.85 (m)                       | +        | +        | +        | +        | +        | +        |
|                           | 6.46 (s)                            | +        | +        | nd       | nd       | +        | +        |
|                           | 3.86 (s)                            | +        | +        | nd       | nd       | +        | +        |
|                           | 3.84 (s)                            | +        | +        | +        | +        | +        | +        |
|                           | 3.68 (s)                            | nd       | nd       | nd       | nd       | +        | +        |
| <b>8. <i>p</i>-cymene</b> | 1.75 (s)                            | +        | nd       | nd       | nd       | nd       | +        |
|                           | 1.19 (d, <i>J</i> = 5.5)            | +        | +        | +        | +        | nd       | +        |
|                           | 2.87 (m)                            | +        | +        | +        | +        | nd       | +        |
|                           | 2.23 (s)                            | +        | +        | +        | +        | +        | +        |

|                         |                          |          |          |          |          |          |          |
|-------------------------|--------------------------|----------|----------|----------|----------|----------|----------|
| <b>9. Piperidine</b>    | 1.23 (d, $J=8.5$ )       | +        | +        | +        | +        | +        | +        |
|                         | 2.79 (t)                 | 2.76 (m) | 2.75 (m) | 2.75 (m) | 2.75 (m) | 2.75 (m) | 2.75 (m) |
|                         | 2.18 (s)                 | nd       | nd       | nd       | nd       | 2.19 (s) | nd       |
|                         | 1.58 (t)                 | 1.58 (m) | 1.58 (m) | 1.58 (m) | 1.58 (m) | nd       | 1.58 (m) |
|                         | 1.55 (d)                 | 1.56 (m) | 1.55 (m) | 1.56 (m) | 1.56 (m) | nd       | 1.56 (m) |
| <b>10. Cubebol</b>      | 1.51 (m)                 | +        | +        | +        | +        | nd       | +        |
|                         | 1.84-1.37 (m)            | +        | +        | +        | +        | nd       | +        |
|                         | 1.28 (s)                 | +        | +        | +        | +        | +        | +        |
|                         | 0.97 (d, $J=6.8$ )       | +        | +        | +        | +        | 0.97 (m) | +        |
|                         | 0.94 (d, $J=6.5$ )       | +        | +        | +        | +        | 0.94 (m) | +        |
|                         | 0.91 (d, $J=4.3$ )       | +        | +        | +        | +        | 0.91 (m) | +        |
|                         | 0.87 (d, $J=3.4$ )       | 0.88 (m) | 0.88 (m) | 0.88 (m) | 0.88 (m) | 0.87 (m) | 0.88 (m) |
|                         | 0.83 (dd, $J=3.4, 3.4$ ) | 0.88 (m) | 0.88 (m) | 0.83 (m) | 0.88 (m) | 0.87 (m) | 0.88 (m) |
| <b>11. D-Germacrene</b> | 4.93 (brs)               | +        | +        | +        | +        | +        | +        |
|                         | 2.30-190 (m)             | +        | +        | +        | +        | +        | +        |
|                         | 1.45 (brs)               | +        | +        | +        | +        | +        | +        |
|                         | 1.30 (m)                 | +        | +        | +        | +        | +        | +        |
|                         | 0.88 (d, $J=6.7$ )       | 0.88 (m) | 0.88 (m) | 0.88 (m) | 0.88 (m) | 0.87 (m) | 0.88 (m) |
| <b>12. Ledol</b>        | 0.84 (d, $J=6.8$ )       | +        | +        | +        | +        | 0.85 (m) | +        |
|                         | 1.65-156 (m)             | +        | +        | +        | +        | +        | +        |
|                         | 1.39 (m)                 | +        | +        | +        | +        | nd       | +        |
|                         | 1.15 (s)                 | +        | +        | +        | +        | +        | +        |
|                         | 1.02 (s)                 | +        | +        | +        | +        | +        | +        |
|                         | 0.98 (s)                 | +        | +        | +        | +        | +        | +        |
| 0.92 (d, $J=7.00$ )     | +                        | +        | +        | +        | 0.91 (m) | +        |          |

(\* Indicates the identification has been confirm with 2D  $^1\text{H}$   $J$ -resolved (JRES) NMR spectroscopy. (nd): not detected. ME: methanol extract; EE: ethanol extract; HE: hexane extract; HF: hexane fraction; EAF: ethyl acetate fraction; AMF: aqueous methanol fraction. Metabolites reported from; **1**: Souza et al. (2004), **2**: Miyata et al. (1998), **3**: Souza et al. (2005), **4**: Laurentiz et al. (2015), **5** and **6**: Prabhu and Mulchandani, (1985), **7**: Ryu et al. (2002), **8**: Human Metabolome Database (HMDB) 05805, **9**: HMDB 0034301, **10**: Chen et al. (2001), **11**: Mori et al. (1990), **12**: Miyazawa et al. (1994).

**Table S2.** Nitric oxide (NO) production by extracts and fractions of *P. cubeba* L. stimulated with LPS and IFN- $\gamma$  in RAW 264.7 cells.

| Conc.              | NO production ( $\mu\text{g/mL}$ ) |                  |                  |                  |                  |                  |
|--------------------|------------------------------------|------------------|------------------|------------------|------------------|------------------|
|                    | ME                                 | EE               | HE               | HF               | EAF              | AMF              |
| LPS, IFN- $\gamma$ | 45.53 $\pm$ 3.98                   | 45.53 $\pm$ 3.98 | 45.53 $\pm$ 3.98 | 45.53 $\pm$ 3.98 | 45.53 $\pm$ 3.98 | 45.53 $\pm$ 3.98 |
| 1.95               | 41.14 $\pm$ 3.46                   | 40.49 $\pm$ 1.02 | n.d              | 44.32 $\pm$ 1.57 | 44.48 $\pm$ 2.70 | n.d              |
| 3.90               | 39.33 $\pm$ 4.14                   | 35.82 $\pm$ 4.52 | 35.20 $\pm$ 9.52 | 43.13 $\pm$ 0.85 | 42.37 $\pm$ 1.69 | 43.49 $\pm$ 2.26 |
| 7.81               | 38.29 $\pm$ 3.47                   | 33.13 $\pm$ 7.61 | 34.20 $\pm$ 8.94 | 40.90 $\pm$ 0.93 | 39.28 $\pm$ 2.39 | 40.43 $\pm$ 5.85 |
| 15.63              | 31.73 $\pm$ 2.95                   | 31.88 $\pm$ 5.19 | 32.99 $\pm$ 9.81 | 37.96 $\pm$ 0.48 | 39.03 $\pm$ 1.44 | 37.79 $\pm$ 3.24 |
| 31.25              | 31.16 $\pm$ 2.96                   | 24.29 $\pm$ 7.36 | 37.00 $\pm$ 5.75 | 33.72 $\pm$ 1.29 | 36.42 $\pm$ 2.09 | 33.27 $\pm$ 2.22 |
| 62.50              | 22.98 $\pm$ 5.18                   | 23.13 $\pm$ 1.81 | 28.96 $\pm$ 0.54 | 34.44 $\pm$ 0.64 | 37.68 $\pm$ 2.98 | 27.31 $\pm$ 1.83 |
| 125.00             | n.d                                | n.d              | 22.12 $\pm$ 6.59 | n.d              | n.d              | 18.88 $\pm$ 2.15 |
| Control            | 4.09 $\pm$ 0.15                    | 4.09 $\pm$ 0.15  | 4.09 $\pm$ 0.15  | 4.09 $\pm$ 0.15  | 4.09 $\pm$ 0.15  | 4.09 $\pm$ 0.15  |
| Curcumin           | 4.79 $\pm$ 0.12                    | 4.79 $\pm$ 0.12  | 4.79 $\pm$ 0.12  | 4.79 $\pm$ 0.12  | 4.79 $\pm$ 0.12  | 4.79 $\pm$ 0.12  |

Values are the mean  $\pm$  S.D. of replications (n =3). n.d: no data. ME: methanol extract; EE: ethanol extract; HE: hexane extract; HF: hexane fraction; EAF: ethyl acetate fraction; AMF: aqueous methanol fraction.

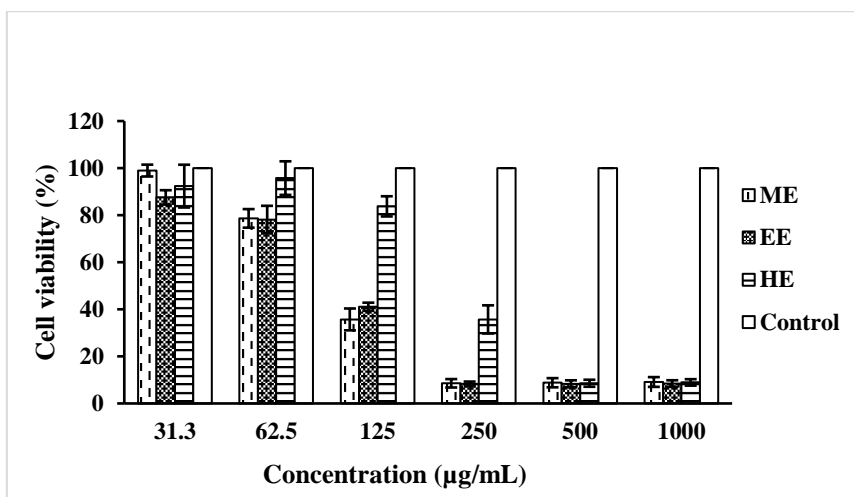

**Figure S1.** Percentage of cell viability (%) treated with different *P. cubeba* L. extracts. Values are the mean  $\pm$  S.D. of replications (n=3). ME: methanol extract; EE: ethanol extract; HE: hexane extract.

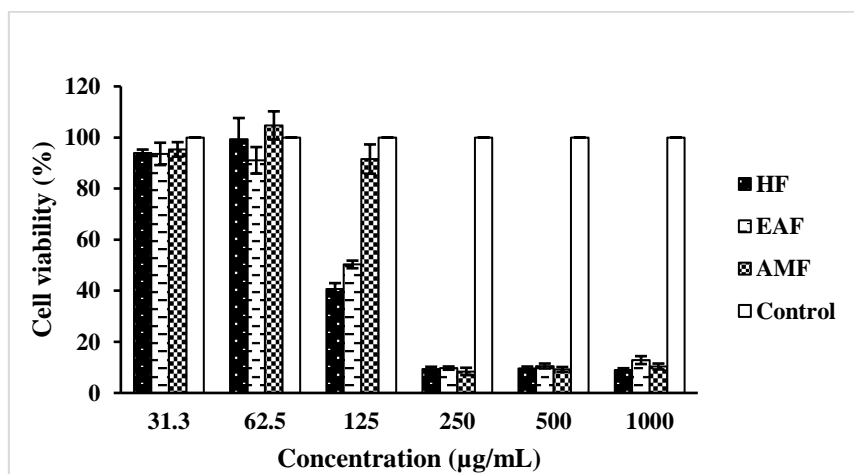

**Figure S2.** Percentage of cell viability (%) treated with different *P. cubeba* L. fractions. Values are the mean  $\pm$  S.D. of replications (n=3). HF: hexane fraction; EAF: ethyl acetate fraction; AMF: aqueous methanol fraction.

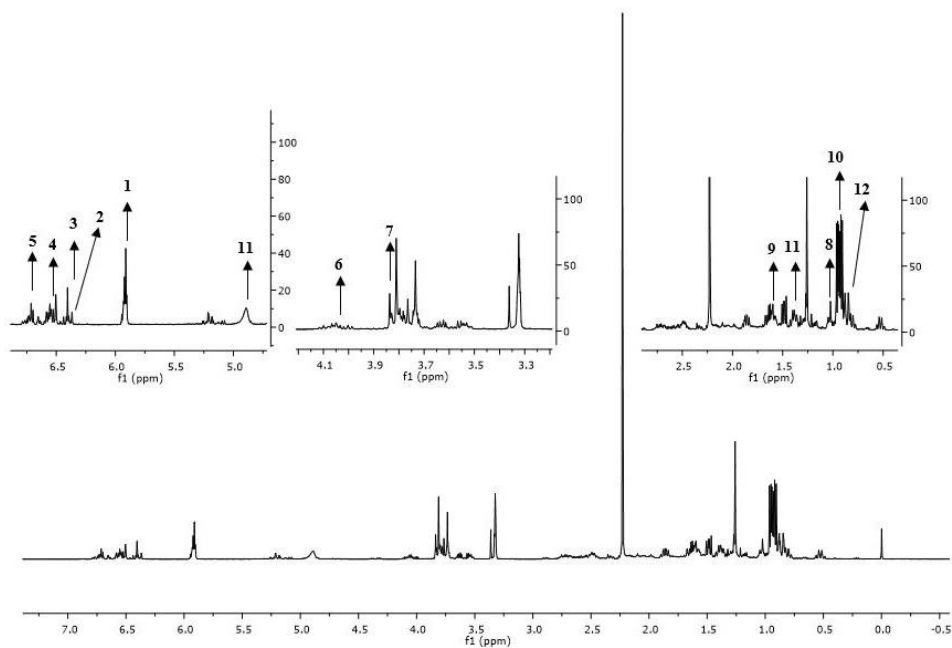

**Figure S3.** The  $^1\text{H}$  NMR spectra of ethanol extract of *P. cubeba* L.. The numbers indicate the identified putative metabolites. 1: cubebin; 2: yatein; 3: hinokinin; 4: dihydrocubebin; 5: dihydroclusin; 6: cubebinin; 7: magnosalin; 8: *p*-cymene; 9: piperidine; 10: cubebol; 11: D-germacrene; 12: ledol.

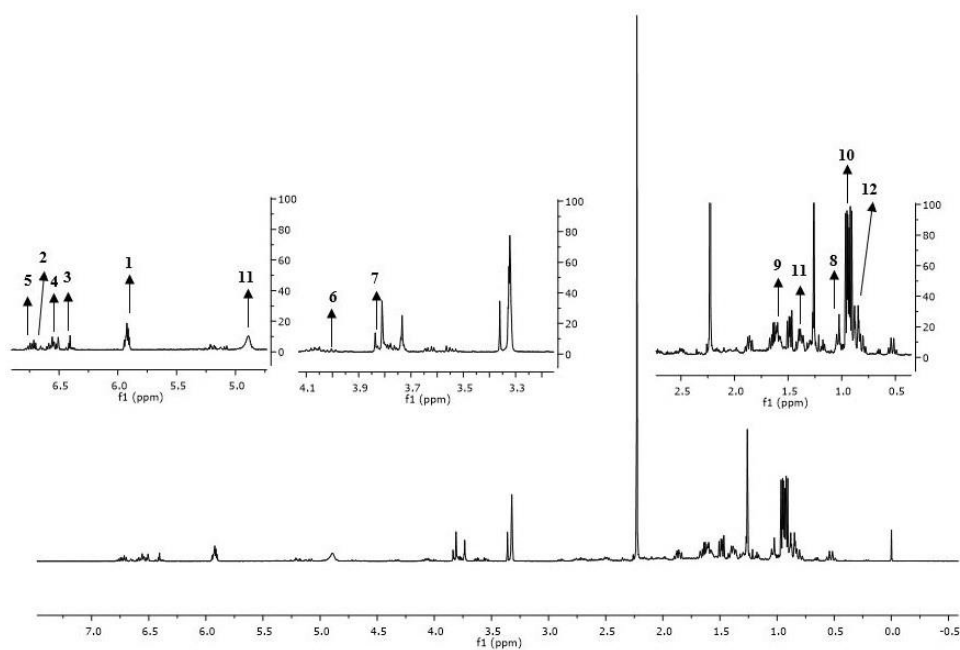

**Figure S4.** The  $^1\text{H}$  NMR spectra of hexane extract of *P. cubeba* L.. The numbers indicate the identified putative metabolites. 1: cubebin; 2: yatein; 3: hinokinin; 4: dihydrocubebin; 5: dihydroclusin; 6: cubebinin; 7: magnosalin; 8: *p*-cymene; 9: piperidine; 10: cubebol; 11: D-germacrene; 12: ledol.

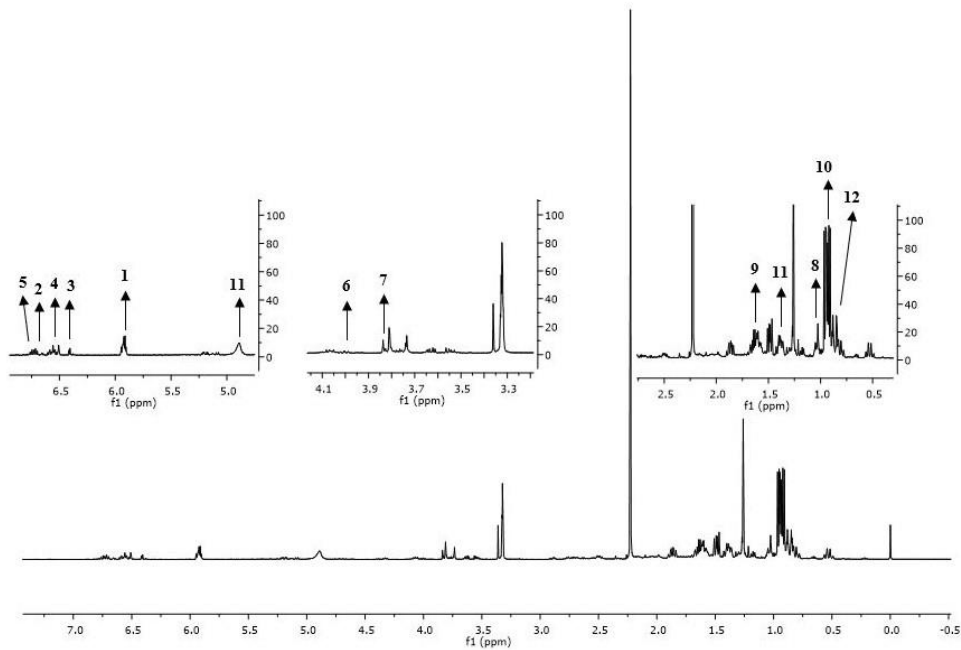

**Figure S5.** The  $^1\text{H}$  NMR spectra of hexane fraction of *P. cubeba* L.. The numbers indicate the identified putative metabolites. 1: cubebin; 2: yatein; 3: hinokinin; 4: dihydrocubebin; 5: dihydroclusin; 6: cubebinin; 7: magnosalin; 8: *p*-cymene; 9: piperidine; 10: cubebol; 11: D-germacrene; 12: ledol.

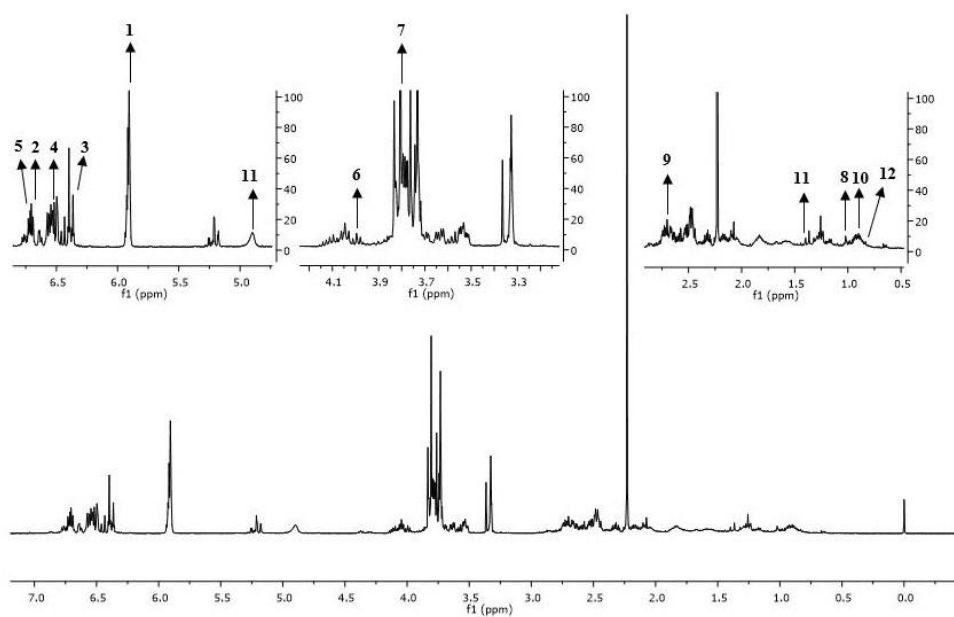

**Figure S6.** The  $^1\text{H}$  NMR spectra of ethyl acetate fraction of *P. cubeba* L.. The numbers indicate the identified putative metabolites. 1: cubebin; 2: yatein; 3: hinokinin; 4: dihydrocubebin; 5: dihydroclusin; 6: cubebinin; 7: magnosalin; 8: *p*-cymene; 9: piperidine; 10: cubebol; 11: D-germacrene; 12: ledol.

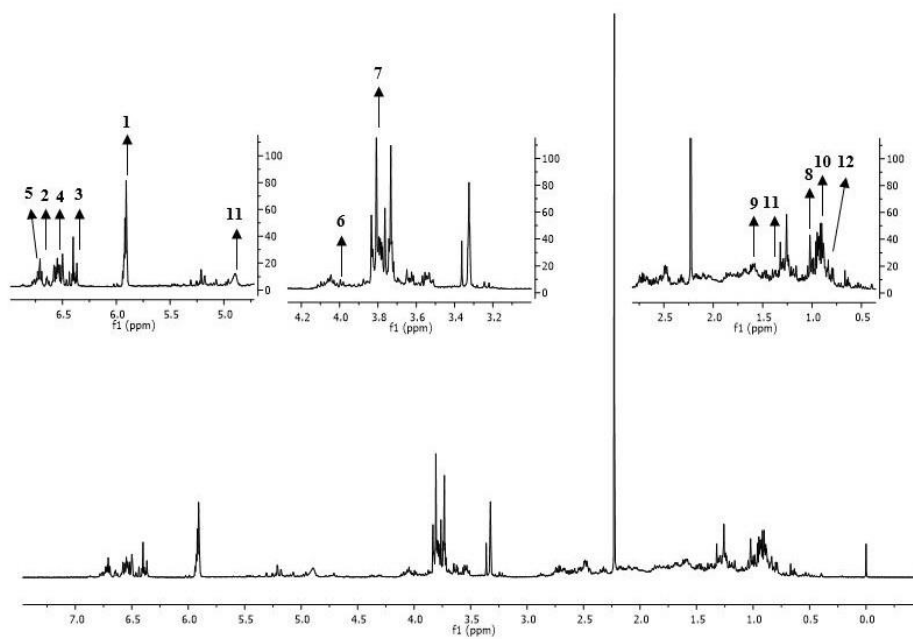

**Figure S7.** The  $^1\text{H}$  NMR spectra of aqueous methanol fraction of *P. cubeba* L.. The numbers indicate the identified putative metabolites. **1:** cubebin; **2:** yatein; **3:** hinokinin; **4:** dihydrocubebin; **5:** dihydroclusin; **6:** cubebinin; **7:** magnosalin; **8:** *p*-cymene; **9:** piperidine; **10:** cubebol; **11:** D-germacrene; **12:** ledol.

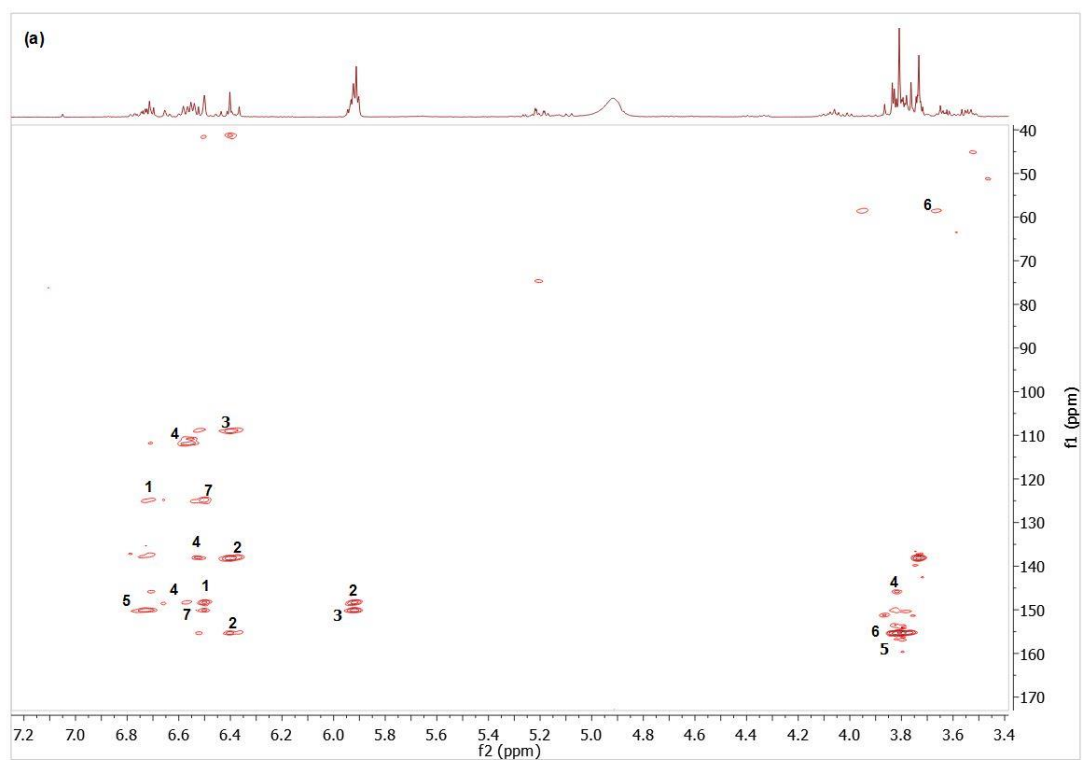

**Figure S8 (a).** Representative heteronuclear bond correlation (HMBC) spectrum of methanol extract of *P. cubeba* L. in the range of  $\delta$  3.40- $\delta$  7.00 of  $^1\text{H}$  and  $\delta$  50- $\delta$  170 of  $^{13}\text{C}$ . The numbers indicate the identified putative metabolites. **1:** correlation of H-7'/C-6', H-2'/C-3' of cubebin; **2:** correlation of H-2/C-4, H-6/C-5/, H-10'/C-3' of yatein; **3:** correlation of H-10/C-4, H-6/C-2 of hinokinin; **4:** correlation of H-2'/C-3', H-2'/C-1', H-2'/C-5, H-4/C-3 of dihydrocubebin; **5:** correlation of H-6'/C-4', Ar-OCH<sub>3</sub>/C-3'' of dihydroclusin; **6:** correlation of H-5/C-3, Ar-OCH<sub>3</sub>/C-3' of cubebinin; **7:** correlation of H-3'/C-1', H-3'/C-4' of magnosalin.



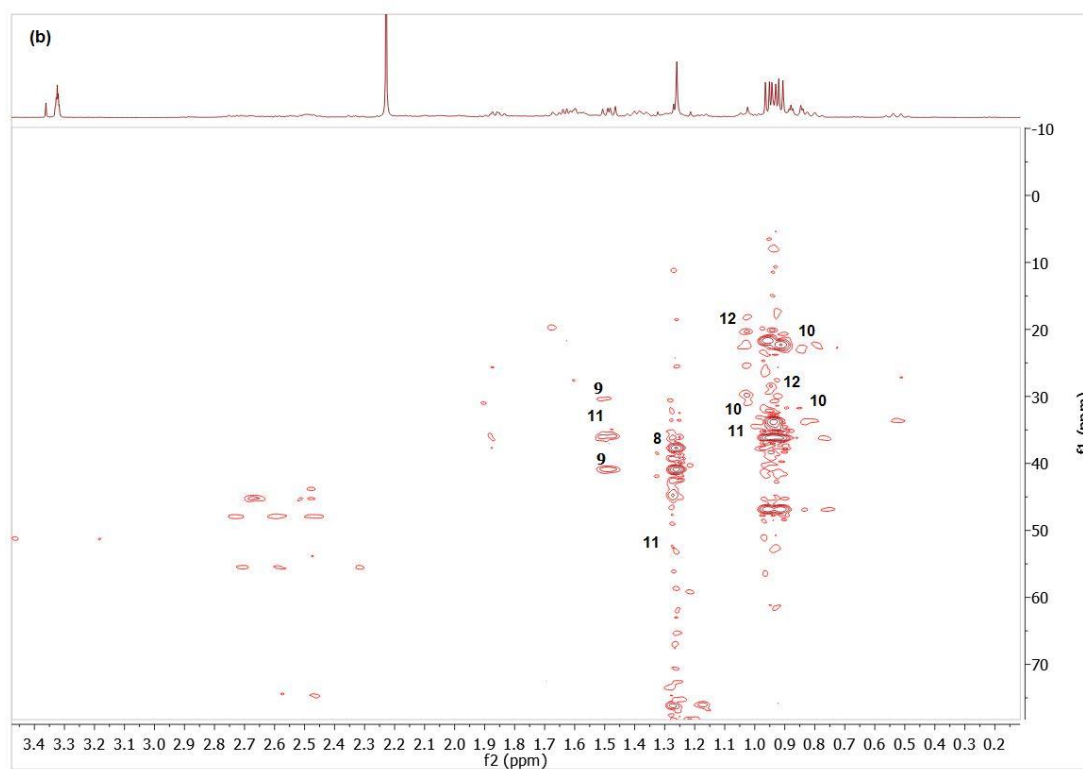

**Figure S8 (b).** Representative heteronuclear bond correlation (HMBC) spectrum of methanol extract of *P. cubeba* L. in the range of  $\delta$  0.20- $\delta$  2.00 of  $^1\text{H}$  and  $\delta$  10- $\delta$  70 of  $^{13}\text{C}$ . The numbers indicate the identified putative metabolites. **8**: correlation of H-9/C-7, H-9/C-4 of *p*-cymene; **9**: correlation of H-4/C-5, H-4/C-2 of piperidine; **10**: correlation of H-14/C-10, H-14/C-1, H-5/C-1, H-5/C-6 of cubebol; **11**: correlation of H-13/C-11, H-8/C-7, H14-C9 of D-germacrene; **12**: correlation of H-12/C-11, H-13/C-7 of ledol.

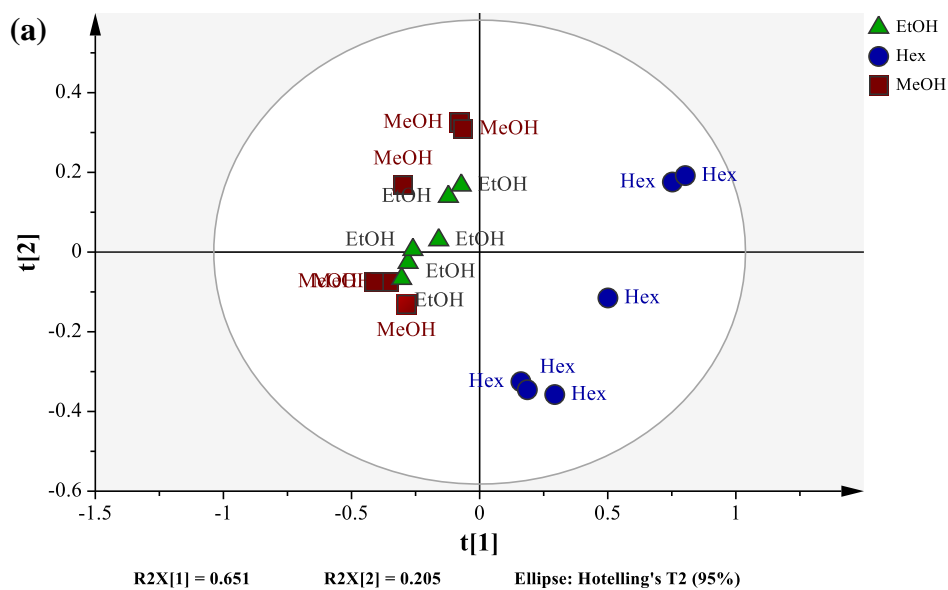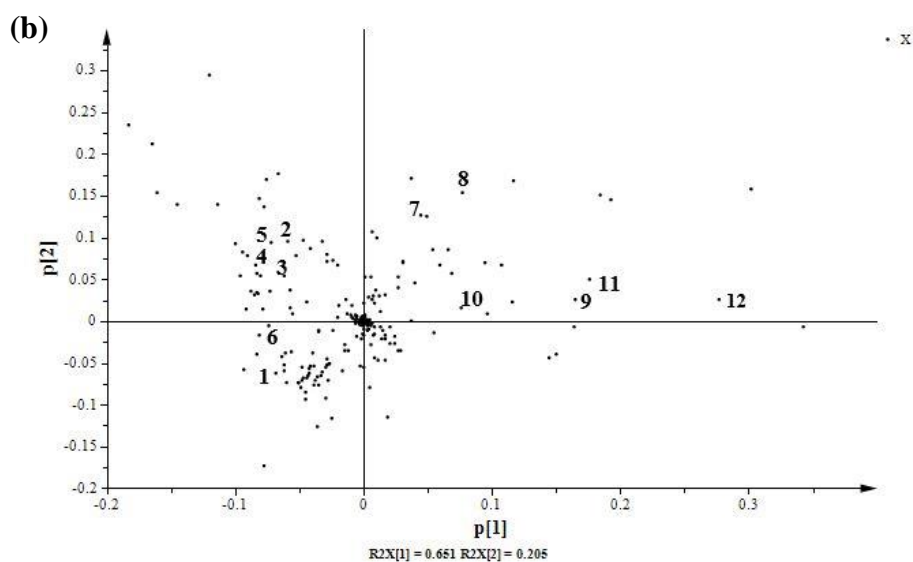

**Figure S9.** Principal component analysis (PCA) (a) score plot (PC1 vs. PC2) and (b) loading scatter plot of  $^1\text{H}$  NMR data of different extracts of *P. cubeba* L. The numbers indicate the identified putative metabolites. 1: cubebin; 2: yatein; 3: hinokinin; 4: dihydrocubebin; 5: dihydroclusin; 6: cubebinin; 7: magnosalin; 8: *p*-cymene; 9: piperidine; 10: cubebol; 11: D-germacrene; 12: ledol, X: metabolites in *P. cubeba* L.

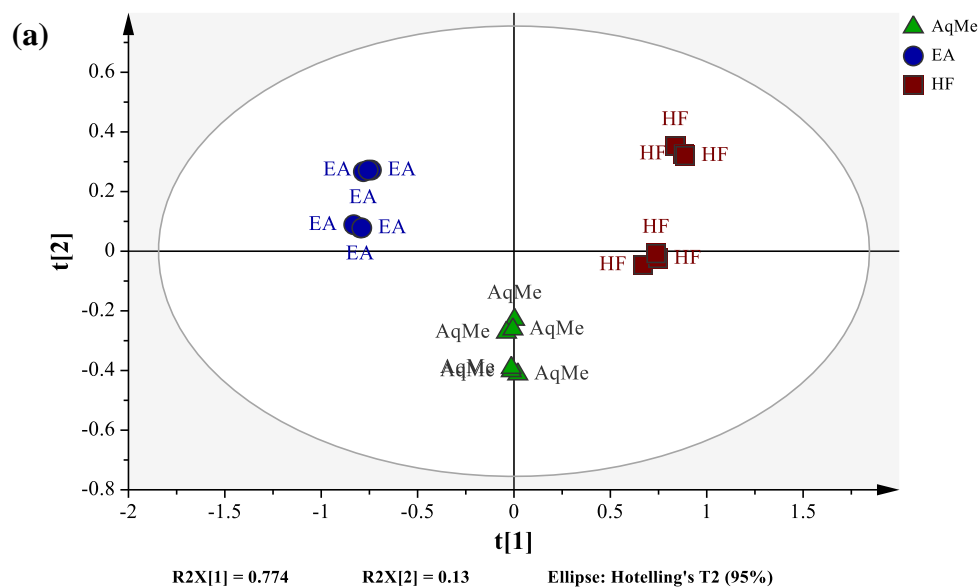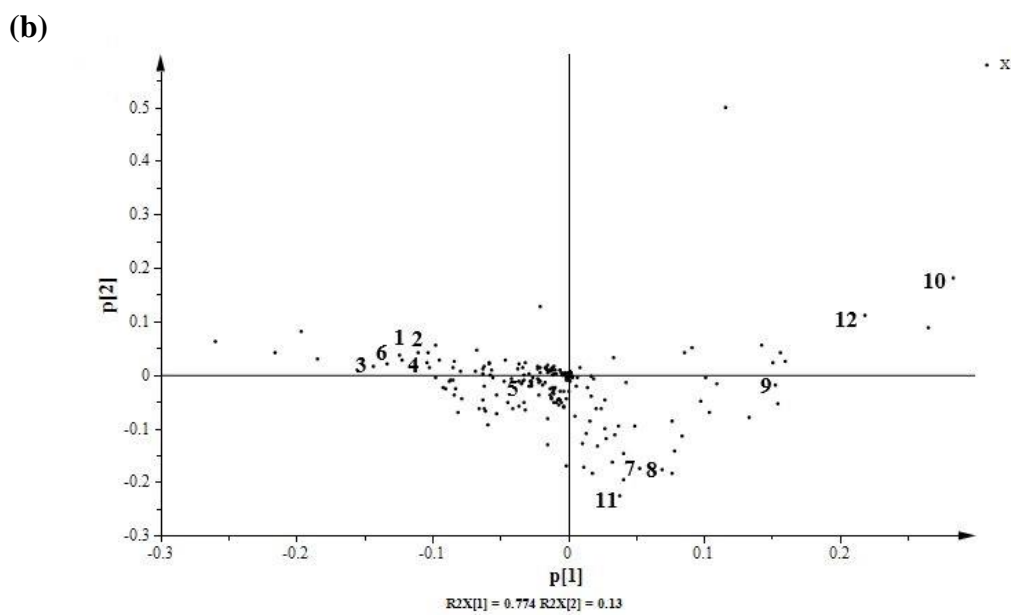

**Figure S10.** PCA (a) score plot (PC1 vs. PC2) and (b) loading scatter plot of  $^1\text{H}$  NMR data of different fractions of *P. cubeba* L. The numbers indicate the identified putative metabolites. 1: cubebin; 2: yatein; 3: hinokinin; 4: dihydrocubebin; 5: dihydroclusin; 6: cubebinin; 7: magnosalin; 8: *p*-cymene; 9: piperidine; 10: cubebol; 11: D-germacrene; 12: ledol, X: metabolites in *P. cubeba* L.

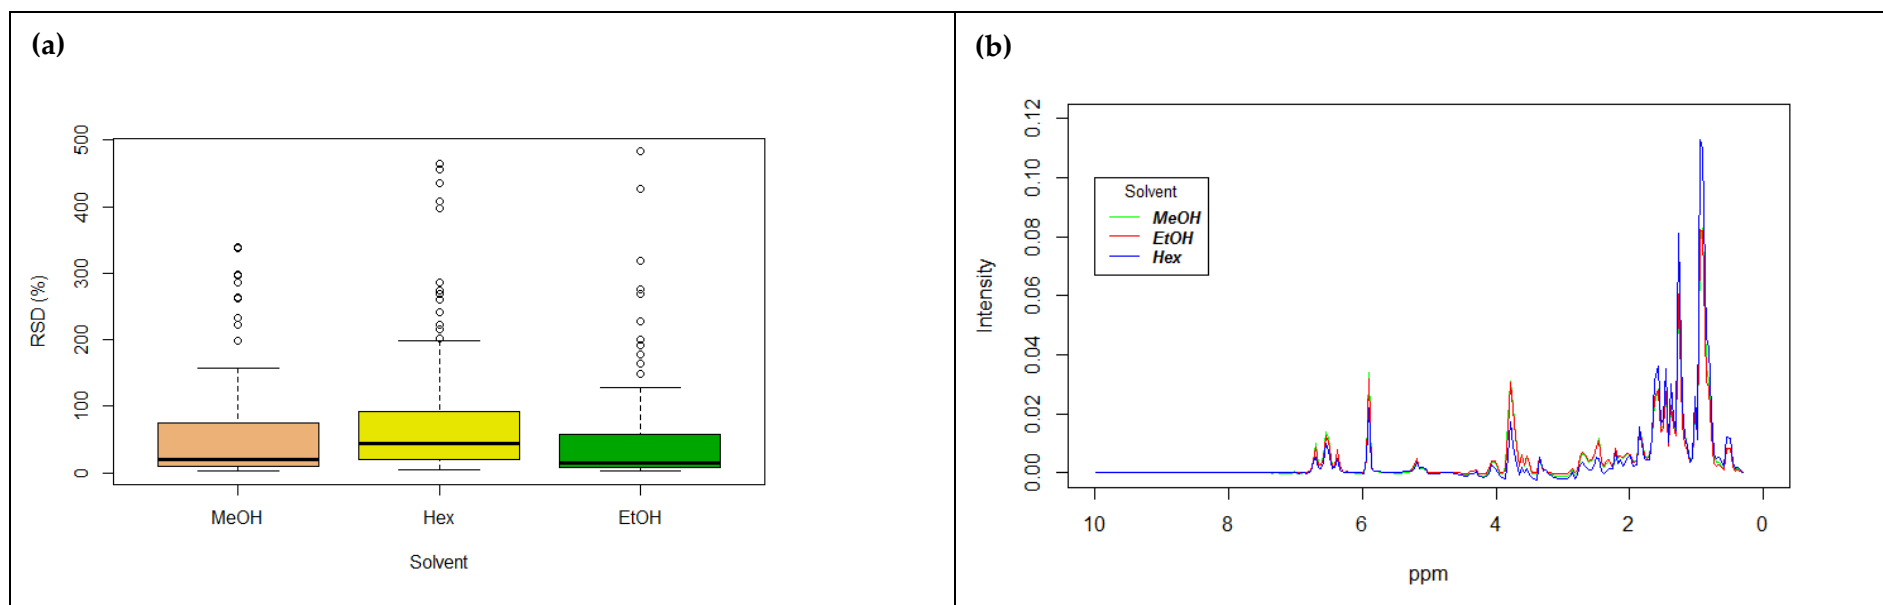

**Figure S11.** Calculation of spectral relative standard deviation (RSD) values of different solvents of *P. cubeba* L. extracts. **(a)** summary of RSD values **(b)** Three overlaid <sup>1</sup>H NMR spectra of *P. cubeba* L. using different extraction solvents (bin width of 0.04 ppm).

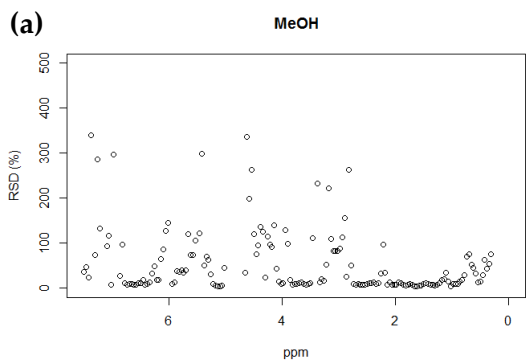

**i.**

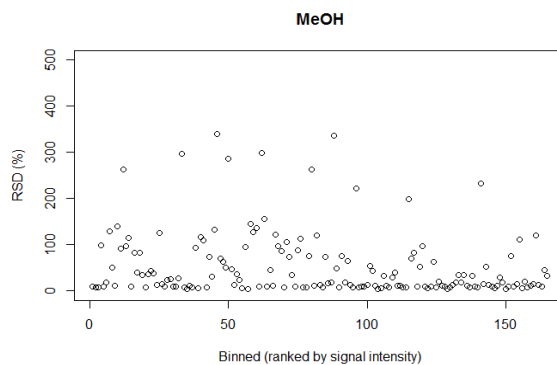

**ii.**

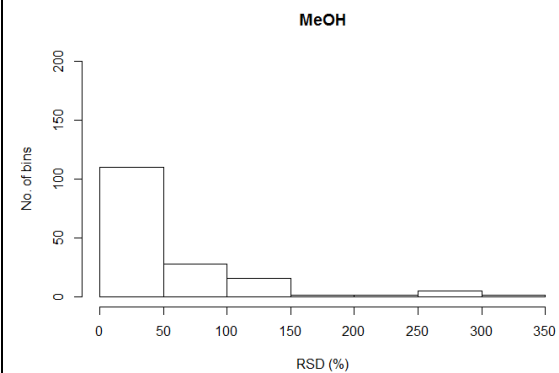

**iii.**

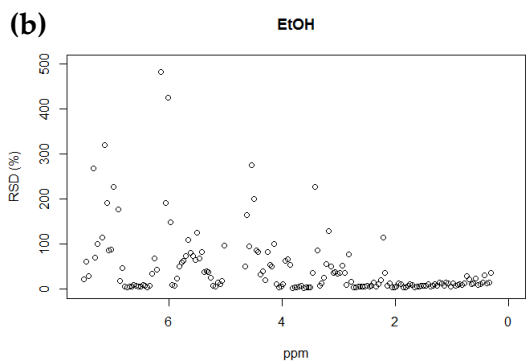

**i.**

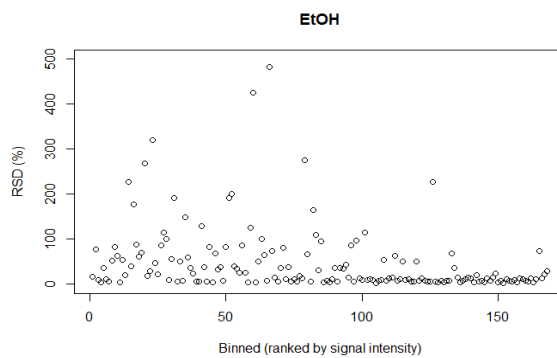

**ii.**

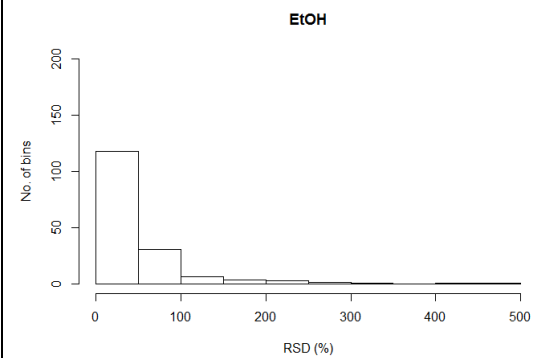

**iii.**

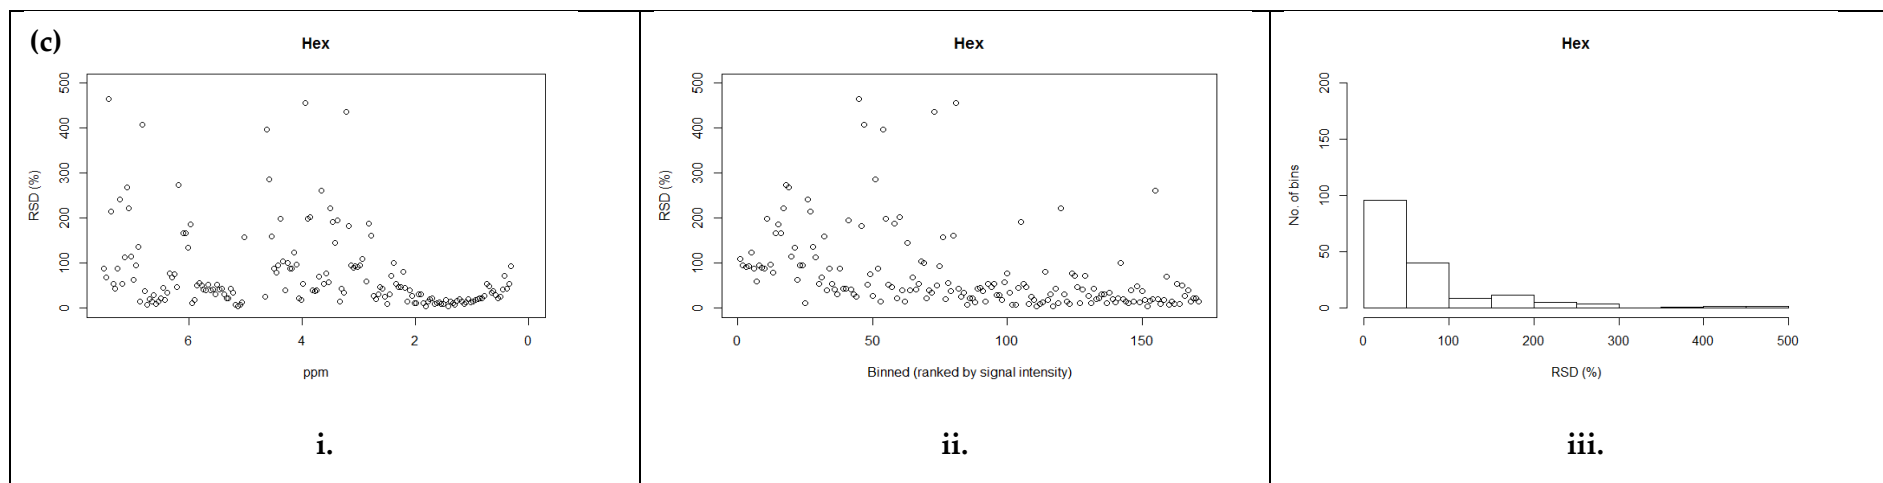

**Figure S12.** RSD calculation for each extract. The RSD results showed the values range from 46.82-75.88% for all extracts. **(a)** Methanol extract, **(b)** Ethanol extract, **(c)** Hexane extract; i. RSD values, ii. RSD values (ranked according to bin signal intensity), iii. Histogram of RSD values showing a right-skewed distribution, Mean RSD (%) and standard deviation for different extraction solvents, MeOH:  $53.20 \pm 69.16$ , EtOH:  $46.82 \pm 72.51$ , Hex:  $75.88 \pm 88.31$ .

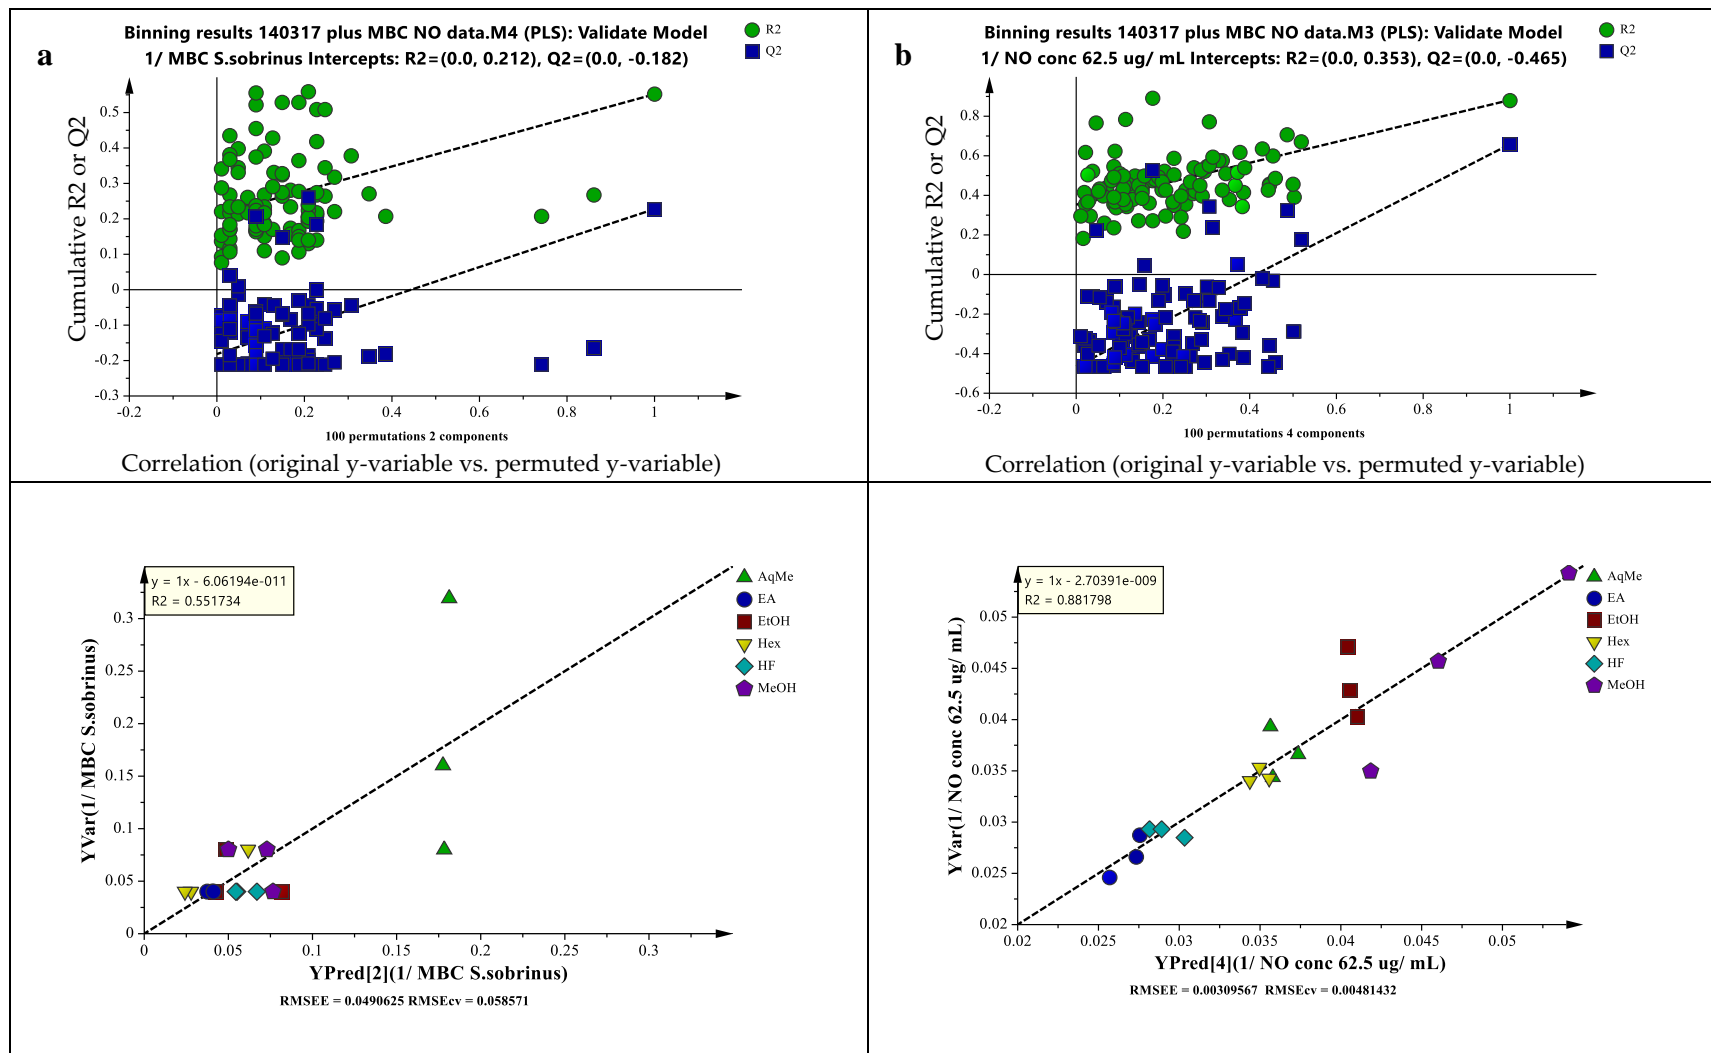

**Figure S13.** Validation of partial least squares (PLS) model using permutation test and observed and predicted plots for (a) minimum bactericidal concentration (1/MBC), (b) nitrite oxide (1/NO) production.
